# Supplementary material for: Comparative analysis of volume growth processes of Masson pine and Chinese fir forests in different regions of southern China
Source: PeerJ. 2025 Jan 6;13:e18706. doi: 10.7717/peerj.18706 (PMC11716076; doi:10.7717/peerj.18706)
Supplement: Supplemental Information 1 [file peerj-13-18706-s001.xlsx]

## Sheet: Model Data
age	total	year	mean	region	species
0	0	0	0	SC	Masson Pine
1	0.552931	0.552931	0.552931	SC	Masson Pine
2	1.61483	1.0619	0.807414	SC	Masson Pine
3	2.99469	1.37986	0.998228	SC	Masson Pine
4	4.61163	1.61694	1.15291	SC	Masson Pine
5	6.41428	1.80265	1.28286	SC	Masson Pine
6	8.36558	1.9513	1.39426	SC	Masson Pine
7	10.437	2.07138	1.49099	SC	Masson Pine
8	12.6055	2.16854	1.57569	SC	Masson Pine
9	14.8523	2.24683	1.65026	SC	Masson Pine
10	17.1616	2.30929	1.71616	SC	Masson Pine
11	19.5199	2.35829	1.77454	SC	Masson Pine
12	21.9156	2.39573	1.8263	SC	Masson Pine
13	24.3388	2.42318	1.87222	SC	Masson Pine
14	26.7808	2.44194	1.91291	SC	Masson Pine
15	29.2339	2.45311	1.94892	SC	Masson Pine
16	31.6915	2.45762	1.98072	SC	Masson Pine
17	34.1478	2.4563	2.00869	SC	Masson Pine
18	36.5976	2.44985	2.0332	SC	Masson Pine
19	39.0365	2.43889	2.05455	SC	Masson Pine
20	41.4605	2.42396	2.07302	SC	Masson Pine
21	43.866	2.40555	2.08886	SC	Masson Pine
22	46.2501	2.38408	2.10228	SC	Masson Pine
23	48.61	2.35993	2.11348	SC	Masson Pine
24	50.9435	2.33344	2.12265	SC	Masson Pine
25	53.2484	2.30493	2.12994	SC	Masson Pine
26	55.5231	2.27465	2.1355	SC	Masson Pine
27	57.7659	2.24286	2.13948	SC	Masson Pine
28	59.9757	2.20977	2.14199	SC	Masson Pine
29	62.1513	2.1756	2.14315	SC	Masson Pine
30	64.2918	2.1405	2.14306	SC	Masson Pine
31	66.3964	2.10466	2.14182	SC	Masson Pine
32	68.4646	2.0682	2.13952	SC	Masson Pine
33	70.4959	2.03127	2.13624	SC	Masson Pine
34	72.4899	1.99398	2.13206	SC	Masson Pine
35	74.4463	1.95644	2.12704	SC	Masson Pine
36	76.3651	1.91875	2.12125	SC	Masson Pine
37	78.2461	1.881	2.11476	SC	Masson Pine
38	80.0893	1.84325	2.10761	SC	Masson Pine
39	81.8949	1.80559	2.09987	SC	Masson Pine
40	83.663	1.76807	2.09158	SC	Masson Pine
41	85.3938	1.73076	2.08277	SC	Masson Pine
42	87.0875	1.69369	2.07351	SC	Masson Pine
43	88.7444	1.65693	2.06382	SC	Masson Pine
44	90.3649	1.62051	2.05375	SC	Masson Pine
45	91.9494	1.58446	2.04332	SC	Masson Pine
46	93.4982	1.54882	2.03257	SC	Masson Pine
47	95.0118	1.51361	2.02153	SC	Masson Pine
48	96.4907	1.47887	2.01022	SC	Masson Pine
49	97.9352	1.4446	1.99868	SC	Masson Pine
50	99.3461	1.41083	1.98692	SC	Masson Pine
51	100.724	1.37757	1.97497	SC	Masson Pine
52	102.068	1.34485	1.96286	SC	Masson Pine
53	103.381	1.31266	1.95059	SC	Masson Pine
54	104.662	1.28102	1.93819	SC	Masson Pine
55	105.912	1.24993	1.92567	SC	Masson Pine
56	107.132	1.21941	1.91306	SC	Masson Pine
57	108.321	1.18945	1.90037	SC	Masson Pine
58	109.481	1.16005	1.8876	SC	Masson Pine
59	110.612	1.13123	1.87478	SC	Masson Pine
60	111.715	1.10297	1.86192	SC	Masson Pine
61	112.79	1.07528	1.84902	SC	Masson Pine
62	113.839	1.04816	1.83611	SC	Masson Pine
63	114.86	1.0216	1.82318	SC	Masson Pine
64	115.856	0.995597	1.81025	SC	Masson Pine
65	116.826	0.970153	1.79732	SC	Masson Pine
66	117.771	0.94526	1.78441	SC	Masson Pine
67	118.692	0.920913	1.77152	SC	Masson Pine
68	119.589	0.897106	1.75867	SC	Masson Pine
69	120.463	0.873833	1.74584	SC	Masson Pine
70	121.314	0.851088	1.73306	SC	Masson Pine
71	122.143	0.828863	1.72032	SC	Masson Pine
72	122.95	0.807151	1.70764	SC	Masson Pine
73	123.736	0.785944	1.69502	SC	Masson Pine
74	124.501	0.765236	1.68245	SC	Masson Pine
75	125.246	0.745018	1.66995	SC	Masson Pine
76	125.972	0.725283	1.65752	SC	Masson Pine
77	126.678	0.706021	1.64517	SC	Masson Pine
78	127.365	0.687225	1.63288	SC	Masson Pine
79	128.034	0.668886	1.62068	SC	Masson Pine
80	128.685	0.650996	1.60856	SC	Masson Pine
81	129.318	0.633547	1.59652	SC	Masson Pine
82	129.935	0.61653	1.58457	SC	Masson Pine
83	130.535	0.599936	1.57271	SC	Masson Pine
84	131.119	0.583757	1.56094	SC	Masson Pine
85	131.687	0.567986	1.54925	SC	Masson Pine
86	132.239	0.552612	1.53766	SC	Masson Pine
87	132.777	0.537629	1.52617	SC	Masson Pine
88	133.3	0.523027	1.51477	SC	Masson Pine
89	133.809	0.508798	1.50347	SC	Masson Pine
90	134.304	0.494935	1.49226	SC	Masson Pine
91	134.785	0.48143	1.48115	SC	Masson Pine
92	135.253	0.468273	1.47014	SC	Masson Pine
93	135.709	0.455458	1.45923	SC	Masson Pine
94	136.152	0.442977	1.44842	SC	Masson Pine
95	136.583	0.430822	1.43771	SC	Masson Pine
96	137.002	0.418985	1.4271	SC	Masson Pine
97	137.409	0.40746	1.41659	SC	Masson Pine
98	137.805	0.396238	1.40618	SC	Masson Pine
99	138.191	0.385312	1.39586	SC	Masson Pine
100	138.565	0.374676	1.38565	SC	Masson Pine
0	0	0	0	SE	Masson Pine
1	0.467818	0.467818	0.467818	SE	Masson Pine
2	1.52331	1.05549	0.761656	SE	Masson Pine
3	2.99712	1.47381	0.999041	SE	Masson Pine
4	4.79841	1.80129	1.1996	SE	Masson Pine
5	6.86247	2.06406	1.37249	SE	Masson Pine
6	9.139	2.27653	1.52317	SE	Masson Pine
7	11.5872	2.4482	1.65531	SE	Masson Pine
8	14.1731	2.58592	1.77164	SE	Masson Pine
9	16.8681	2.69496	1.87423	SE	Masson Pine
10	19.6476	2.77953	1.96476	SE	Masson Pine
11	22.4907	2.84305	2.04461	SE	Masson Pine
12	25.3791	2.88842	2.11492	SE	Masson Pine
13	28.2971	2.91807	2.1767	SE	Masson Pine
14	31.2312	2.93407	2.2308	SE	Masson Pine
15	34.1695	2.93825	2.27797	SE	Masson Pine
16	37.1017	2.93217	2.31885	SE	Masson Pine
17	40.0189	2.91721	2.35405	SE	Masson Pine
18	42.9134	2.89456	2.38408	SE	Masson Pine
19	45.7787	2.8653	2.40941	SE	Masson Pine
20	48.6091	2.83036	2.43045	SE	Masson Pine
21	51.3996	2.79057	2.4476	SE	Masson Pine
22	54.1463	2.74666	2.4612	SE	Masson Pine
23	56.8456	2.69929	2.47155	SE	Masson Pine
24	59.4946	2.64904	2.47894	SE	Masson Pine
25	62.091	2.59641	2.48364	SE	Masson Pine
26	64.6329	2.54188	2.48588	SE	Masson Pine
27	67.1188	2.48583	2.48588	SE	Masson Pine
28	69.5474	2.42864	2.48384	SE	Masson Pine
29	71.918	2.37061	2.47993	SE	Masson Pine
30	74.23	2.31204	2.47433	SE	Masson Pine
31	76.4832	2.25316	2.4672	SE	Masson Pine
32	78.6774	2.19421	2.45867	SE	Masson Pine
33	80.8128	2.13536	2.44887	SE	Masson Pine
34	82.8896	2.07679	2.43793	SE	Masson Pine
35	84.9082	2.01866	2.42595	SE	Masson Pine
36	86.8693	1.96108	2.41304	SE	Masson Pine
37	88.7735	1.90417	2.39928	SE	Masson Pine
38	90.6215	1.84803	2.38478	SE	Masson Pine
39	92.4143	1.79274	2.3696	SE	Masson Pine
40	94.1526	1.73837	2.35382	SE	Masson Pine
41	95.8376	1.68498	2.3375	SE	Masson Pine
42	97.4702	1.63262	2.32072	SE	Masson Pine
43	99.0516	1.58133	2.30352	SE	Masson Pine
44	100.583	1.53114	2.28597	SE	Masson Pine
45	102.065	1.48207	2.26811	SE	Masson Pine
46	103.499	1.43415	2.24998	SE	Masson Pine
47	104.886	1.38739	2.23162	SE	Masson Pine
48	106.228	1.3418	2.21309	SE	Masson Pine
49	107.525	1.29738	2.1944	SE	Masson Pine
50	108.78	1.25412	2.17559	SE	Masson Pine
51	109.992	1.21204	2.1567	SE	Masson Pine
52	111.163	1.17111	2.13775	SE	Masson Pine
53	112.294	1.13134	2.11876	SE	Masson Pine
54	113.387	1.0927	2.09976	SE	Masson Pine
55	114.442	1.05519	2.08076	SE	Masson Pine
56	115.461	1.01878	2.0618	SE	Masson Pine
57	116.444	0.983467	2.04288	SE	Masson Pine
58	117.393	0.949226	2.02403	SE	Masson Pine
59	118.309	0.916038	2.00525	SE	Masson Pine
60	119.193	0.883881	1.98656	SE	Masson Pine
61	120.046	0.852736	1.96797	SE	Masson Pine
62	120.869	0.82258	1.9495	SE	Masson Pine
63	121.662	0.79339	1.93114	SE	Masson Pine
64	122.427	0.765144	1.91293	SE	Masson Pine
65	123.165	0.73782	1.89485	SE	Masson Pine
66	123.876	0.711393	1.87692	SE	Masson Pine
67	124.562	0.685841	1.85914	SE	Masson Pine
68	125.223	0.661141	1.84152	SE	Masson Pine
69	125.861	0.637269	1.82407	SE	Masson Pine
70	126.475	0.614203	1.80678	SE	Masson Pine
71	127.067	0.591921	1.78967	SE	Masson Pine
72	127.637	0.570399	1.77274	SE	Masson Pine
73	128.187	0.549616	1.75598	SE	Masson Pine
74	128.716	0.529549	1.73941	SE	Masson Pine
75	129.227	0.510178	1.72302	SE	Masson Pine
76	129.718	0.491481	1.70682	SE	Masson Pine
77	130.191	0.473438	1.6908	SE	Masson Pine
78	130.648	0.456027	1.67497	SE	Masson Pine
79	131.087	0.43923	1.65933	SE	Masson Pine
80	131.51	0.423026	1.64387	SE	Masson Pine
81	131.917	0.407398	1.62861	SE	Masson Pine
82	132.309	0.392325	1.61353	SE	Masson Pine
83	132.687	0.377791	1.59864	SE	Masson Pine
84	133.051	0.363777	1.58394	SE	Masson Pine
85	133.401	0.350266	1.56943	SE	Masson Pine
86	133.739	0.337241	1.5551	SE	Masson Pine
87	134.063	0.324686	1.54096	SE	Masson Pine
88	134.376	0.312586	1.527	SE	Masson Pine
89	134.677	0.300925	1.51322	SE	Masson Pine
90	134.966	0.289687	1.49963	SE	Masson Pine
91	135.245	0.278859	1.48621	SE	Masson Pine
92	135.514	0.268426	1.47298	SE	Masson Pine
93	135.772	0.258374	1.45992	SE	Masson Pine
94	136.021	0.248691	1.44703	SE	Masson Pine
95	136.26	0.239363	1.43432	SE	Masson Pine
96	136.491	0.230378	1.42178	SE	Masson Pine
97	136.712	0.221723	1.4094	SE	Masson Pine
98	136.926	0.213388	1.3972	SE	Masson Pine
99	137.131	0.205361	1.38516	SE	Masson Pine
100	137.329	0.197631	1.37329	SE	Masson Pine
0	0	0	0	SW	Masson Pine
1	0.29765	0.29765	0.29765	SW	Masson Pine
2	1.17369	0.876041	0.586846	SW	Masson Pine
3	2.5707	1.39701	0.856901	SW	Masson Pine
4	4.42683	1.85613	1.10671	SW	Masson Pine
5	6.6829	2.25607	1.33658	SW	Masson Pine
6	9.28392	2.60101	1.54732	SW	Masson Pine
7	12.1794	2.89552	1.73992	SW	Masson Pine
8	15.3236	3.14412	1.91545	SW	Masson Pine
9	18.6747	3.35117	2.07497	SW	Masson Pine
10	22.1955	3.52077	2.21955	SW	Masson Pine
11	25.8522	3.65672	2.3502	SW	Masson Pine
12	29.6148	3.76255	2.4679	SW	Masson Pine
13	33.4563	3.8415	2.57356	SW	Masson Pine
14	37.3528	3.89653	2.66806	SW	Masson Pine
15	41.2831	3.93035	2.75221	SW	Masson Pine
16	45.2286	3.94543	2.82679	SW	Masson Pine
17	49.1726	3.94401	2.89251	SW	Masson Pine
18	53.1007	3.92812	2.95004	SW	Masson Pine
19	57.0003	3.89961	3.00002	SW	Masson Pine
20	60.8605	3.86014	3.04302	SW	Masson Pine
21	64.6717	3.8112	3.0796	SW	Masson Pine
22	68.4258	3.75416	3.11026	SW	Masson Pine
23	72.1161	3.69023	3.13548	SW	Masson Pine
24	75.7366	3.62051	3.15569	SW	Masson Pine
25	79.2825	3.54597	3.1713	SW	Masson Pine
26	82.75	3.46749	3.18269	SW	Masson Pine
27	86.1359	3.38585	3.19022	SW	Masson Pine
28	89.4376	3.30176	3.1942	SW	Masson Pine
29	92.6535	3.21584	3.19495	SW	Masson Pine
30	95.7821	3.12863	3.19274	SW	Masson Pine
31	98.8227	3.04062	3.18783	SW	Masson Pine
32	101.775	2.95223	3.18047	SW	Masson Pine
33	104.639	2.86386	3.17087	SW	Masson Pine
34	107.415	2.77582	3.15925	SW	Masson Pine
35	110.103	2.68841	3.1458	SW	Masson Pine
36	112.705	2.60188	3.13069	SW	Masson Pine
37	115.221	2.51643	3.11409	SW	Masson Pine
38	117.654	2.43225	3.09615	SW	Masson Pine
39	120.003	2.34951	3.077	SW	Masson Pine
40	122.271	2.26832	3.05679	SW	Masson Pine
41	124.46	2.18881	3.03562	SW	Masson Pine
42	126.571	2.11105	3.0136	SW	Masson Pine
43	128.606	2.03513	2.99085	SW	Masson Pine
44	130.568	1.96109	2.96744	SW	Masson Pine
45	132.456	1.88898	2.94348	SW	Masson Pine
46	134.275	1.81882	2.91903	SW	Masson Pine
47	136.026	1.75064	2.89417	SW	Masson Pine
48	137.71	1.68445	2.86897	SW	Masson Pine
49	139.331	1.62023	2.84348	SW	Masson Pine
50	140.889	1.55799	2.81777	SW	Masson Pine
51	142.386	1.49772	2.79189	SW	Masson Pine
52	143.826	1.43938	2.76588	SW	Masson Pine
53	145.209	1.38296	2.73979	SW	Masson Pine
54	146.537	1.32843	2.71365	SW	Masson Pine
55	147.813	1.27576	2.68751	SW	Masson Pine
56	149.038	1.22491	2.66139	SW	Masson Pine
57	150.214	1.17584	2.63533	SW	Masson Pine
58	151.342	1.12851	2.60935	SW	Masson Pine
59	152.425	1.08289	2.58348	SW	Masson Pine
60	153.464	1.03893	2.55773	SW	Masson Pine
61	154.461	0.996587	2.53214	SW	Masson Pine
62	155.416	0.955816	2.50672	SW	Masson Pine
63	156.333	0.916575	2.48148	SW	Masson Pine
64	157.212	0.878819	2.45643	SW	Masson Pine
65	158.054	0.842503	2.4316	SW	Masson Pine
66	158.862	0.807582	2.407	SW	Masson Pine
67	159.636	0.774013	2.38262	SW	Masson Pine
68	160.378	0.741752	2.35849	SW	Masson Pine
69	161.088	0.710756	2.33461	SW	Masson Pine
70	161.769	0.680982	2.31099	SW	Masson Pine
71	162.422	0.65239	2.28763	SW	Masson Pine
72	163.047	0.624938	2.26454	SW	Masson Pine
73	163.645	0.598585	2.24172	SW	Masson Pine
74	164.219	0.573294	2.21917	SW	Masson Pine
75	164.768	0.549026	2.1969	SW	Masson Pine
76	165.293	0.525743	2.17491	SW	Masson Pine
77	165.797	0.503409	2.1532	SW	Masson Pine
78	166.279	0.481989	2.13178	SW	Masson Pine
79	166.74	0.461449	2.11064	SW	Masson Pine
80	167.182	0.441755	2.08977	SW	Masson Pine
81	167.605	0.422875	2.0692	SW	Masson Pine
82	168.01	0.404778	2.0489	SW	Masson Pine
83	168.397	0.387433	2.02888	SW	Masson Pine
84	168.768	0.370812	2.00914	SW	Masson Pine
85	169.123	0.354885	1.98968	SW	Masson Pine
86	169.462	0.339625	1.97049	SW	Masson Pine
87	169.787	0.325006	1.95158	SW	Masson Pine
88	170.098	0.311003	1.93294	SW	Masson Pine
89	170.396	0.29759	1.91456	SW	Masson Pine
90	170.681	0.284743	1.89645	SW	Masson Pine
91	170.953	0.272441	1.87861	SW	Masson Pine
92	171.214	0.260661	1.86102	SW	Masson Pine
93	171.463	0.249381	1.84369	SW	Masson Pine
94	171.702	0.238581	1.82661	SW	Masson Pine
95	171.93	0.228241	1.80979	SW	Masson Pine
96	172.148	0.218343	1.79321	SW	Masson Pine
97	172.357	0.208868	1.77688	SW	Masson Pine
98	172.557	0.199798	1.76079	SW	Masson Pine
99	172.748	0.191117	1.74493	SW	Masson Pine
100	172.931	0.182808	1.72931	SW	Masson Pine
0	0	0	0	SC	Chinese Fir
1	0.826829	0.826829	0.826829	SC	Chinese Fir
2	2.7142	1.88737	1.3571	SC	Chinese Fir
3	5.33247	2.61828	1.77749	SC	Chinese Fir
4	8.49298	3.16051	2.12325	SC	Chinese Fir
5	12.0596	3.56666	2.41193	SC	Chinese Fir
6	15.9275	3.86784	2.65458	SC	Chinese Fir
7	20.0129	4.08544	2.85899	SC	Chinese Fir
8	24.2483	4.2354	3.03104	SC	Chinese Fir
9	28.5784	4.33011	3.17538	SC	Chinese Fir
10	32.9579	4.37948	3.29579	SC	Chinese Fir
11	37.3495	4.39161	3.39541	SC	Chinese Fir
12	41.7227	4.37317	3.47689	SC	Chinese Fir
13	46.0524	4.32974	3.54249	SC	Chinese Fir
14	50.3184	4.26598	3.59417	SC	Chinese Fir
15	54.5042	4.18584	3.63362	SC	Chinese Fir
16	58.5969	4.09264	3.66231	SC	Chinese Fir
17	62.5861	3.98919	3.68153	SC	Chinese Fir
18	66.464	3.87788	3.69244	SC	Chinese Fir
19	70.2247	3.76073	3.69604	SC	Chinese Fir
20	73.8641	3.63943	3.69321	SC	Chinese Fir
21	77.3796	3.51544	3.68474	SC	Chinese Fir
22	80.7695	3.38998	3.67134	SC	Chinese Fir
23	84.0336	3.26405	3.65363	SC	Chinese Fir
24	87.1721	3.13851	3.63217	SC	Chinese Fir
25	90.1862	3.01407	3.60745	SC	Chinese Fir
26	93.0775	2.89131	3.5799	SC	Chinese Fir
27	95.8482	2.77071	3.54993	SC	Chinese Fir
28	98.5008	2.65266	3.51789	SC	Chinese Fir
29	101.038	2.53746	3.48408	SC	Chinese Fir
30	103.464	2.42535	3.44879	SC	Chinese Fir
31	105.78	2.31652	3.41226	SC	Chinese Fir
32	107.991	2.2111	3.37473	SC	Chinese Fir
33	110.1	2.10917	3.33638	SC	Chinese Fir
34	112.111	2.0108	3.29739	SC	Chinese Fir
35	114.027	1.91601	3.25792	SC	Chinese Fir
36	115.852	1.82479	3.21811	SC	Chinese Fir
37	117.589	1.73713	3.17809	SC	Chinese Fir
38	119.242	1.65298	3.13795	SC	Chinese Fir
39	120.814	1.57229	3.09781	SC	Chinese Fir
40	122.309	1.49499	3.05774	SC	Chinese Fir
41	123.73	1.42101	3.01782	SC	Chinese Fir
42	125.081	1.35026	2.97811	SC	Chinese Fir
43	126.363	1.28265	2.93868	SC	Chinese Fir
44	127.581	1.21809	2.89958	SC	Chinese Fir
45	128.738	1.15648	2.86084	SC	Chinese Fir
46	129.836	1.09772	2.82251	SC	Chinese Fir
47	130.877	1.04171	2.78462	SC	Chinese Fir
48	131.866	0.988345	2.7472	SC	Chinese Fir
49	132.803	0.937527	2.71027	SC	Chinese Fir
50	133.692	0.889156	2.67385	SC	Chinese Fir
51	134.536	0.843133	2.63795	SC	Chinese Fir
52	135.335	0.79936	2.60259	SC	Chinese Fir
53	136.093	0.757742	2.56778	SC	Chinese Fir
54	136.811	0.718187	2.53353	SC	Chinese Fir
55	137.491	0.680603	2.49984	SC	Chinese Fir
56	138.136	0.644904	2.46672	SC	Chinese Fir
57	138.747	0.611003	2.43416	SC	Chinese Fir
58	139.326	0.578819	2.40217	SC	Chinese Fir
59	139.874	0.548271	2.37075	SC	Chinese Fir
60	140.394	0.519283	2.33989	SC	Chinese Fir
61	140.885	0.491781	2.3096	SC	Chinese Fir
62	141.351	0.465694	2.27986	SC	Chinese Fir
63	141.792	0.440954	2.25067	SC	Chinese Fir
64	142.21	0.417495	2.22202	SC	Chinese Fir
65	142.605	0.395255	2.19392	SC	Chinese Fir
66	142.979	0.374173	2.16635	SC	Chinese Fir
67	143.333	0.354192	2.1393	SC	Chinese Fir
68	143.668	0.335257	2.11277	SC	Chinese Fir
69	143.986	0.317316	2.08675	SC	Chinese Fir
70	144.286	0.300318	2.06123	SC	Chinese Fir
71	144.57	0.284215	2.0362	SC	Chinese Fir
72	144.839	0.268963	2.01166	SC	Chinese Fir
73	145.094	0.254518	1.98759	SC	Chinese Fir
74	145.335	0.240837	1.96398	SC	Chinese Fir
75	145.563	0.227883	1.94083	SC	Chinese Fir
76	145.778	0.215617	1.91813	SC	Chinese Fir
77	145.982	0.204003	1.89587	SC	Chinese Fir
78	146.175	0.193008	1.87404	SC	Chinese Fir
79	146.358	0.1826	1.85263	SC	Chinese Fir
80	146.531	0.172748	1.83163	SC	Chinese Fir
81	146.694	0.163422	1.81104	SC	Chinese Fir
82	146.849	0.154596	1.79084	SC	Chinese Fir
83	146.995	0.146242	1.77102	SC	Chinese Fir
84	147.133	0.138337	1.75158	SC	Chinese Fir
85	147.264	0.130856	1.73252	SC	Chinese Fir
86	147.388	0.123776	1.71381	SC	Chinese Fir
87	147.505	0.117077	1.69546	SC	Chinese Fir
88	147.616	0.110739	1.67745	SC	Chinese Fir
89	147.72	0.104742	1.65978	SC	Chinese Fir
90	147.819	0.0990673	1.64244	SC	Chinese Fir
91	147.913	0.0936989	1.62542	SC	Chinese Fir
92	148.002	0.08862	1.60871	SC	Chinese Fir
93	148.085	0.0838151	1.59232	SC	Chinese Fir
94	148.165	0.0792697	1.57622	SC	Chinese Fir
95	148.24	0.0749698	1.56042	SC	Chinese Fir
96	148.311	0.0709022	1.5449	SC	Chinese Fir
97	148.378	0.0670545	1.52967	SC	Chinese Fir
98	148.441	0.063415	1.51471	SC	Chinese Fir
99	148.501	0.0599723	1.50001	SC	Chinese Fir
100	148.558	0.056716	1.48558	SC	Chinese Fir
0	0	0	0	SE	Chinese Fir
1	2.05117	2.05117	2.05117	SE	Chinese Fir
2	5.11814	3.06696	2.55907	SE	Chinese Fir
3	8.64961	3.53148	2.8832	SE	Chinese Fir
4	12.4634	3.8138	3.11585	SE	Chinese Fir
5	16.4576	3.99414	3.29151	SE	Chinese Fir
6	20.5654	4.10789	3.42757	SE	Chinese Fir
7	24.74	4.17459	3.53429	SE	Chinese Fir
8	28.9465	4.20643	3.61831	SE	Chinese Fir
9	33.1582	4.21168	3.68424	SE	Chinese Fir
10	37.3544	4.19623	3.73544	SE	Chinese Fir
11	41.5188	4.16445	3.77444	SE	Chinese Fir
12	45.6385	4.1197	3.80321	SE	Chinese Fir
13	49.7031	4.06461	3.82332	SE	Chinese Fir
14	53.7044	4.00127	3.83603	SE	Chinese Fir
15	57.6358	3.93138	3.84239	SE	Chinese Fir
16	61.4921	3.85632	3.84326	SE	Chinese Fir
17	65.2694	3.77725	3.83937	SE	Chinese Fir
18	68.9645	3.6951	3.83136	SE	Chinese Fir
19	72.5751	3.61069	3.81974	SE	Chinese Fir
20	76.0998	3.52468	3.80499	SE	Chinese Fir
21	79.5375	3.43763	3.7875	SE	Chinese Fir
22	82.8875	3.35004	3.76761	SE	Chinese Fir
23	86.1498	3.26229	3.74564	SE	Chinese Fir
24	89.3245	3.17473	3.72185	SE	Chinese Fir
25	92.4122	3.08765	3.69649	SE	Chinese Fir
26	95.4135	3.00131	3.66975	SE	Chinese Fir
27	98.3294	2.91589	3.64183	SE	Chinese Fir
28	101.161	2.83158	3.61289	SE	Chinese Fir
29	103.909	2.74853	3.58309	SE	Chinese Fir
30	106.576	2.66684	3.55254	SE	Chinese Fir
31	109.163	2.58663	3.52138	SE	Chinese Fir
32	111.671	2.50796	3.48972	SE	Chinese Fir
33	114.102	2.43091	3.45763	SE	Chinese Fir
34	116.457	2.35552	3.42522	SE	Chinese Fir
35	118.739	2.28184	3.39255	SE	Chinese Fir
36	120.949	2.20988	3.3597	SE	Chinese Fir
37	123.089	2.13966	3.32672	SE	Chinese Fir
38	125.16	2.07121	3.29368	SE	Chinese Fir
39	127.164	2.00451	3.26063	SE	Chinese Fir
40	129.104	1.93956	3.2276	SE	Chinese Fir
41	130.98	1.87636	3.19464	SE	Chinese Fir
42	132.795	1.81489	3.16179	SE	Chinese Fir
43	134.55	1.75514	3.12908	SE	Chinese Fir
44	136.247	1.69708	3.09653	SE	Chinese Fir
45	137.888	1.6407	3.06418	SE	Chinese Fir
46	139.474	1.58596	3.03205	SE	Chinese Fir
47	141.007	1.53283	3.00015	SE	Chinese Fir
48	142.488	1.4813	2.9685	SE	Chinese Fir
49	143.92	1.43132	2.93713	SE	Chinese Fir
50	145.302	1.38286	2.90605	SE	Chinese Fir
51	146.638	1.3359	2.87526	SE	Chinese Fir
52	147.929	1.2904	2.84478	SE	Chinese Fir
53	149.175	1.24633	2.81462	SE	Chinese Fir
54	150.379	1.20364	2.78479	SE	Chinese Fir
55	151.541	1.16232	2.75529	SE	Chinese Fir
56	152.663	1.12231	2.72613	SE	Chinese Fir
57	153.747	1.08359	2.69731	SE	Chinese Fir
58	154.793	1.04613	2.66885	SE	Chinese Fir
59	155.803	1.00989	2.64073	SE	Chinese Fir
60	156.778	0.974829	2.61296	SE	Chinese Fir
61	157.719	0.940924	2.58555	SE	Chinese Fir
62	158.627	0.90814	2.5585	SE	Chinese Fir
63	159.503	0.876443	2.5318	SE	Chinese Fir
64	160.349	0.845803	2.50545	SE	Chinese Fir
65	161.165	0.816188	2.47947	SE	Chinese Fir
66	161.953	0.787567	2.45383	SE	Chinese Fir
67	162.713	0.75991	2.42855	SE	Chinese Fir
68	163.446	0.733188	2.40362	SE	Chinese Fir
69	164.153	0.707372	2.37903	SE	Chinese Fir
70	164.836	0.682434	2.3548	SE	Chinese Fir
71	165.494	0.658347	2.3309	SE	Chinese Fir
72	166.129	0.635083	2.30735	SE	Chinese Fir
73	166.742	0.612617	2.28413	SE	Chinese Fir
74	167.333	0.590922	2.26125	SE	Chinese Fir
75	167.903	0.569976	2.2387	SE	Chinese Fir
76	168.452	0.549752	2.21648	SE	Chinese Fir
77	168.983	0.530228	2.19458	SE	Chinese Fir
78	169.494	0.511381	2.173	SE	Chinese Fir
79	169.987	0.493188	2.15174	SE	Chinese Fir
80	170.463	0.475629	2.13079	SE	Chinese Fir
81	170.922	0.458681	2.11014	SE	Chinese Fir
82	171.364	0.442326	2.0898	SE	Chinese Fir
83	171.79	0.426542	2.06976	SE	Chinese Fir
84	172.202	0.411311	2.05002	SE	Chinese Fir
85	172.598	0.396614	2.03057	SE	Chinese Fir
86	172.981	0.382434	2.0114	SE	Chinese Fir
87	173.35	0.368752	1.99252	SE	Chinese Fir
88	173.705	0.355552	1.97392	SE	Chinese Fir
89	174.048	0.342818	1.95559	SE	Chinese Fir
90	174.378	0.330533	1.93754	SE	Chinese Fir
91	174.697	0.318682	1.91975	SE	Chinese Fir
92	175.004	0.30725	1.90222	SE	Chinese Fir
93	175.301	0.296223	1.88495	SE	Chinese Fir
94	175.586	0.285588	1.86794	SE	Chinese Fir
95	175.861	0.275329	1.85117	SE	Chinese Fir
96	176.127	0.265435	1.83466	SE	Chinese Fir
97	176.383	0.255893	1.81838	SE	Chinese Fir
98	176.63	0.24669	1.80234	SE	Chinese Fir
99	176.867	0.237814	1.78654	SE	Chinese Fir
100	177.097	0.229255	1.77097	SE	Chinese Fir
0	0	0	0	SW	Chinese Fir
1	0.134338	0.134338	0.134338	SW	Chinese Fir
2	1.09374	0.959401	0.54687	SW	Chinese Fir
3	3.41351	2.31977	1.13784	SW	Chinese Fir
4	7.2174	3.80389	1.80435	SW	Chinese Fir
5	12.358	5.14062	2.4716	SW	Chinese Fir
6	18.5529	6.19483	3.09214	SW	Chinese Fir
7	25.4776	6.92474	3.63966	SW	Chinese Fir
8	32.8214	7.34379	4.10267	SW	Chinese Fir
9	40.3149	7.49347	4.47943	SW	Chinese Fir
10	47.7407	7.42588	4.77407	SW	Chinese Fir
11	54.9343	7.19358	4.99403	SW	Chinese Fir
12	61.7785	6.84419	5.14821	SW	Chinese Fir
13	68.1966	6.41807	5.24589	SW	Chinese Fir
14	74.1444	5.94782	5.29603	SW	Chinese Fir
15	79.6031	5.4587	5.30687	SW	Chinese Fir
16	84.5727	4.96954	5.28579	SW	Chinese Fir
17	89.0665	4.4938	5.2392	SW	Chinese Fir
18	93.1071	4.04063	5.17262	SW	Chinese Fir
19	96.7229	3.6158	5.09068	SW	Chinese Fir
20	99.9454	3.22252	4.99727	SW	Chinese Fir
21	102.808	2.86211	4.8956	SW	Chinese Fir
22	105.342	2.53451	4.78827	SW	Chinese Fir
23	107.581	2.23875	4.67743	SW	Chinese Fir
24	109.554	1.97322	4.56475	SW	Chinese Fir
25	111.29	1.73595	4.4516	SW	Chinese Fir
26	112.815	1.52477	4.33903	SW	Chinese Fir
27	114.152	1.33743	4.22786	SW	Chinese Fir
28	115.324	1.17171	4.11871	SW	Chinese Fir
29	116.349	1.02547	4.01205	SW	Chinese Fir
30	117.246	0.896689	3.9082	SW	Chinese Fir
31	118.03	0.783474	3.8074	SW	Chinese Fir
32	118.714	0.684098	3.7098	SW	Chinese Fir
33	119.311	0.596983	3.61547	SW	Chinese Fir
34	119.831	0.520701	3.52445	SW	Chinese Fir
35	120.285	0.45397	3.43672	SW	Chinese Fir
36	120.681	0.395642	3.35225	SW	Chinese Fir
37	121.026	0.344696	3.27096	SW	Chinese Fir
38	121.326	0.300225	3.19278	SW	Chinese Fir
39	121.587	0.261427	3.11762	SW	Chinese Fir
40	121.815	0.227595	3.04537	SW	Chinese Fir
41	122.013	0.198104	2.97593	SW	Chinese Fir
42	122.185	0.172407	2.90918	SW	Chinese Fir
43	122.335	0.150022	2.84501	SW	Chinese Fir
44	122.466	0.130528	2.78332	SW	Chinese Fir
45	122.579	0.113555	2.72399	SW	Chinese Fir
46	122.678	0.0987801	2.66692	SW	Chinese Fir
47	122.764	0.0859207	2.612	SW	Chinese Fir
48	122.839	0.0747301	2.55914	SW	Chinese Fir
49	122.904	0.0649932	2.50824	SW	Chinese Fir
50	122.96	0.056522	2.45921	SW	Chinese Fir
51	123.01	0.0491527	2.41195	SW	Chinese Fir
52	123.052	0.0427425	2.36639	SW	Chinese Fir
53	123.089	0.037167	2.32244	SW	Chinese Fir
54	123.122	0.0323178	2.28003	SW	Chinese Fir
55	123.15	0.0281006	2.23909	SW	Chinese Fir
56	123.174	0.0244332	2.19954	SW	Chinese Fir
57	123.196	0.0212439	2.16133	SW	Chinese Fir
58	123.214	0.0184707	2.12438	SW	Chinese Fir
59	123.23	0.0160592	2.08865	SW	Chinese Fir
60	123.244	0.0139624	2.05407	SW	Chinese Fir
61	123.256	0.0121392	2.02059	SW	Chinese Fir
62	123.267	0.010554	1.98817	SW	Chinese Fir
63	123.276	0.00917574	1.95676	SW	Chinese Fir
64	123.284	0.00797739	1.92631	SW	Chinese Fir
65	123.291	0.00693551	1.89678	SW	Chinese Fir
66	123.297	0.00602966	1.86813	SW	Chinese Fir
67	123.302	0.00524211	1.84033	SW	Chinese Fir
68	123.307	0.00455739	1.81333	SW	Chinese Fir
69	123.311	0.0039621	1.78711	SW	Chinese Fir
70	123.314	0.00344456	1.76163	SW	Chinese Fir
71	123.317	0.00299461	1.73686	SW	Chinese Fir
72	123.32	0.00260343	1.71277	SW	Chinese Fir
73	123.322	0.00226335	1.68934	SW	Chinese Fir
74	123.324	0.00196768	1.66654	SW	Chinese Fir
75	123.326	0.00171064	1.64434	SW	Chinese Fir
76	123.327	0.00148717	1.62273	SW	Chinese Fir
77	123.328	0.0012929	1.60167	SW	Chinese Fir
78	123.33	0.001124	1.58115	SW	Chinese Fir
79	123.33	0.000977162	1.56115	SW	Chinese Fir
80	123.331	0.000849508	1.54164	SW	Chinese Fir
81	123.332	0.00073853	1.52262	SW	Chinese Fir
82	123.333	0.00064205	1.50406	SW	Chinese Fir
83	123.333	0.000558173	1.48594	SW	Chinese Fir
84	123.334	0.000485254	1.46826	SW	Chinese Fir
85	123.334	0.000421861	1.45099	SW	Chinese Fir
86	123.335	0.000366749	1.43412	SW	Chinese Fir
87	123.335	0.000318837	1.41764	SW	Chinese Fir
88	123.335	0.000277184	1.40154	SW	Chinese Fir
89	123.335	0.000240972	1.38579	SW	Chinese Fir
90	123.336	0.000209492	1.3704	SW	Chinese Fir
91	123.336	0.000182123	1.35534	SW	Chinese Fir
92	123.336	0.000158331	1.34061	SW	Chinese Fir
93	123.336	0.000137646	1.32619	SW	Chinese Fir
94	123.336	0.000119664	1.31209	SW	Chinese Fir
95	123.336	0.000104031	1.29828	SW	Chinese Fir
96	123.336	9.04401e-05	1.28475	SW	Chinese Fir
97	123.336	7.86249e-05	1.27151	SW	Chinese Fir
98	123.337	6.83532e-05	1.25854	SW	Chinese Fir
99	123.337	5.94235e-05	1.24582	SW	Chinese Fir
100	123.337	5.16603e-05	1.23337	SW	Chinese Fir

## Sheet: Data Processing
age	total	year	mean	rate	region	species
1	0.552931	0.552931	0.552931	0	SC	马尾松
10	17.1616	2.30929	1.71616	18.7515	SC	Masson Pine
20	41.4605	2.42396	2.07302	8.29	SC	Masson Pine
30	64.2918	2.1405	2.14306	4.31788	SC	Masson Pine
40	83.663	1.76807	2.09158	2.61853	SC	Masson Pine
50	99.3461	1.41083	1.98692	1.71391	SC	Masson Pine
60	111.715	1.10297	1.86192	1.17209	SC	Masson Pine
70	121.314	0.851088	1.73306	0.823843	SC	Masson Pine
80	128.685	0.650996	1.60856	0.589652	SC	Masson Pine
90	134.304	0.494935	1.49226	0.427301	SC	Masson Pine
100	138.565	0.374676	1.38565	0.312358	SC	Masson Pine
1	0.467818	0.467818	0.467818	0	SE	马尾松
10	19.6476	2.77953	1.96476	19.0697	SE	Masson Pine
20	48.6091	2.83036	2.43045	8.48605	SE	Masson Pine
30	74.23	2.31204	2.47433	4.17147	SE	Masson Pine
40	94.1526	1.73837	2.35382	2.36635	SE	Masson Pine
50	108.78	1.25412	2.17559	1.44156	SE	Masson Pine
60	119.193	0.883881	1.98656	0.913597	SE	Masson Pine
70	126.475	0.614203	1.80678	0.592793	SE	Masson Pine
80	131.51	0.423026	1.64387	0.390323	SE	Masson Pine
90	134.966	0.289687	1.49963	0.259436	SE	Masson Pine
100	137.329	0.197631	1.37329	0.173502	SE	Masson Pine
1	0.29765	0.29765	0.29765	0	SW	马尾松
10	22.1955	3.52077	2.21955	19.4707	SW	Masson Pine
20	60.8605	3.86014	3.04302	9.31058	SW	Masson Pine
30	95.7821	3.12863	3.19274	4.45877	SW	Masson Pine
40	122.271	2.26832	3.05679	2.42962	SW	Masson Pine
50	140.889	1.55799	2.81777	1.4149	SW	Masson Pine
60	153.464	1.03893	2.55773	0.85444	SW	Masson Pine
70	161.769	0.680982	2.31099	0.526936	SW	Masson Pine
80	167.182	0.441755	2.08977	0.329081	SW	Masson Pine
90	170.681	0.284743	1.89645	0.207111	SW	Masson Pine
100	172.931	0.182808	1.72931	0.130976	SW	Masson Pine
1	0.826829	0.826829	0.826829	0	SC	杉木
10	32.9579	4.37948	3.29579	19.0211	SC	Chinese Fir
20	73.8641	3.63943	3.69321	7.65876	SC	Chinese Fir
30	103.464	2.42535	3.44879	3.3384	SC	Chinese Fir
40	122.309	1.49499	3.05774	1.66944	SC	Chinese Fir
50	133.692	0.889156	2.67385	0.889287	SC	Chinese Fir
60	140.394	0.519283	2.33989	0.488993	SC	Chinese Fir
70	144.286	0.300318	2.06123	0.273461	SC	Chinese Fir
80	146.531	0.172748	1.83163	0.154351	SC	Chinese Fir
90	147.819	0.0990673	1.64244	0.0875729	SC	Chinese Fir
100	148.558	0.056716	1.48558	0.0498307	SC	Chinese Fir
1	2.05117	2.05117	2.05117	0	SE	杉木
10	37.3544	4.19623	3.73544	17.9179	SE	Chinese Fir
20	76.0998	3.52468	3.80499	6.83015	SE	Chinese Fir
30	106.576	2.66684	3.55254	3.33667	SE	Chinese Fir
40	129.104	1.93956	3.2276	1.91171	SE	Chinese Fir
50	145.302	1.38286	2.90605	1.18062	SE	Chinese Fir
60	156.778	0.974829	2.61296	0.759755	SE	Chinese Fir
70	164.836	0.682434	2.3548	0.501096	SE	Chinese Fir
80	170.463	0.475629	2.13079	0.335648	SE	Chinese Fir
90	174.378	0.330533	1.93754	0.227094	SE	Chinese Fir
100	177.097	0.229255	1.77097	0.154672	SE	Chinese Fir
1	0.134338	0.134338	0.134338	0	SW	杉木
10	47.7407	7.42588	4.77407	19.8878	SW	Chinese Fir
20	99.9454	3.22252	4.99727	7.06968	SW	Chinese Fir
30	117.246	0.896689	3.9082	1.59312	SW	Chinese Fir
40	121.815	0.227595	3.04537	0.38223	SW	Chinese Fir
50	122.96	0.056522	2.45921	0.0936012	SW	Chinese Fir
60	123.244	0.0139624	2.05407	0.0230418	SW	Chinese Fir
70	123.314	0.00344456	1.76163	0.00567961	SW	Chinese Fir
80	123.331	0.000849508	1.54164	0.00140043	SW	Chinese Fir
90	123.336	0.000209492	1.3704	0.000345332	SW	Chinese Fir
100	123.337	5.16603e-05	1.23337	8.51573e-05	SW	Chinese Fir

## Sheet: Tabular Data
age	total	year	mean	rate	region	species
10	17.1616	2.30929	1.71616	18.7515	SC	Masson Pine
20	41.4605	2.42396	2.07302	8.29	SC	Masson Pine
30	64.2918	2.1405	2.14306	4.31788	SC	Masson Pine
40	83.663	1.76807	2.09158	2.61853	SC	Masson Pine
50	99.3461	1.41083	1.98692	1.71391	SC	Masson Pine
60	111.715	1.10297	1.86192	1.17209	SC	Masson Pine
70	121.314	0.851088	1.73306	0.823843	SC	Masson Pine
80	128.685	0.650996	1.60856	0.589652	SC	Masson Pine
90	134.304	0.494935	1.49226	0.427301	SC	Masson Pine
100	138.565	0.374676	1.38565	0.312358	SC	Masson Pine
10	19.6476	2.77953	1.96476	19.0697	SE	Masson Pine
20	48.6091	2.83036	2.43045	8.48605	SE	Masson Pine
30	74.23	2.31204	2.47433	4.17147	SE	Masson Pine
40	94.1526	1.73837	2.35382	2.36635	SE	Masson Pine
50	108.78	1.25412	2.17559	1.44156	SE	Masson Pine
60	119.193	0.883881	1.98656	0.913597	SE	Masson Pine
70	126.475	0.614203	1.80678	0.592793	SE	Masson Pine
80	131.51	0.423026	1.64387	0.390323	SE	Masson Pine
90	134.966	0.289687	1.49963	0.259436	SE	Masson Pine
100	137.329	0.197631	1.37329	0.173502	SE	Masson Pine
10	22.1955	3.52077	2.21955	19.4707	SW	Masson Pine
20	60.8605	3.86014	3.04302	9.31058	SW	Masson Pine
30	95.7821	3.12863	3.19274	4.45877	SW	Masson Pine
40	122.271	2.26832	3.05679	2.42962	SW	Masson Pine
50	140.889	1.55799	2.81777	1.4149	SW	Masson Pine
60	153.464	1.03893	2.55773	0.85444	SW	Masson Pine
70	161.769	0.680982	2.31099	0.526936	SW	Masson Pine
80	167.182	0.441755	2.08977	0.329081	SW	Masson Pine
90	170.681	0.284743	1.89645	0.207111	SW	Masson Pine
100	172.931	0.182808	1.72931	0.130976	SW	Masson Pine
10	32.9579	4.37948	3.29579	19.0211	SC	Chinese Fir
20	73.8641	3.63943	3.69321	7.65876	SC	Chinese Fir
30	103.464	2.42535	3.44879	3.3384	SC	Chinese Fir
40	122.309	1.49499	3.05774	1.66944	SC	Chinese Fir
50	133.692	0.889156	2.67385	0.889287	SC	Chinese Fir
60	140.394	0.519283	2.33989	0.488993	SC	Chinese Fir
70	144.286	0.300318	2.06123	0.273461	SC	Chinese Fir
80	146.531	0.172748	1.83163	0.154351	SC	Chinese Fir
90	147.819	0.0990673	1.64244	0.0875729	SC	Chinese Fir
100	148.558	0.056716	1.48558	0.0498307	SC	Chinese Fir
10	37.3544	4.19623	3.73544	17.9179	SE	Chinese Fir
20	76.0998	3.52468	3.80499	6.83015	SE	Chinese Fir
30	106.576	2.66684	3.55254	3.33667	SE	Chinese Fir
40	129.104	1.93956	3.2276	1.91171	SE	Chinese Fir
50	145.302	1.38286	2.90605	1.18062	SE	Chinese Fir
60	156.778	0.974829	2.61296	0.759755	SE	Chinese Fir
70	164.836	0.682434	2.3548	0.501096	SE	Chinese Fir
80	170.463	0.475629	2.13079	0.335648	SE	Chinese Fir
90	174.378	0.330533	1.93754	0.227094	SE	Chinese Fir
100	177.097	0.229255	1.77097	0.154672	SE	Chinese Fir
10	47.7407	7.42588	4.77407	19.8878	SW	Chinese Fir
20	99.9454	3.22252	4.99727	7.06968	SW	Chinese Fir
30	117.246	0.896689	3.9082	1.59312	SW	Chinese Fir
40	121.815	0.227595	3.04537	0.38223	SW	Chinese Fir
50	122.96	0.056522	2.45921	0.0936012	SW	Chinese Fir
60	123.244	0.0139624	2.05407	0.0230418	SW	Chinese Fir
70	123.314	0.00344456	1.76163	0.00567961	SW	Chinese Fir
80	123.331	0.000849508	1.54164	0.00140043	SW	Chinese Fir
90	123.336	0.000209492	1.3704	0.000345332	SW	Chinese Fir
100	123.337	5.16603e-05	1.23337	8.51573e-05	SW	Chinese Fir
